# Supplementary material
Source: PubMed Central journal article supplement (PMC3864474)
Supplement: 10-1055-s-0032-1328612-sup_de_gf626.pdf [file 10-1055-s-0032-1328612-sup_de_gf626.pdf]

# Chemotherapie für eine 70-jährige Mammakarzinompatientin in Deutschland: eine Umfrage der German Breast Group

## Chemotherapy for 70-Year-Old Women with Breast Cancer in Germany: A Survey by the German Breast Group

**Autoren** J. Barinoff<sup>1</sup>, A. Traut<sup>1</sup>, D. Bauerschlag<sup>2</sup>, J. Bischoff<sup>3</sup>, D. Herr<sup>4</sup>, K. Lübke<sup>5</sup>, H.-J. Lück<sup>6</sup>, N. Maass<sup>2</sup>, C. Mundhenke<sup>7</sup>, M. Schmidt<sup>8</sup>, K. Schwedler<sup>9</sup>, M. Thill<sup>10</sup>, J. Steffen<sup>11</sup>, S. Loibl<sup>11</sup>, G. von Minckwitz<sup>11</sup>

**Institute** Die Institutsangaben sind am Ende des Beitrags gelistet

### Schlüsselwörter

- Mammakarzinom
- Mammalignom
- Metastasierung

### Key words

- breast carcinoma
- breast malignancy
- metastasis

### Zusammenfassung

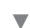

**Ziel:** Ca. die Hälfte der Patientinnen mit Mammakarzinom ist über 65 Jahre alt und ca. ein Drittel ist älter als 70 Jahre. Formell entsprechen die therapeutischen Präferenzen für die über 65-jährigen Brustkrebspatientinnen den Konzepten für jüngere Patientinnen und sind konform mit den Konzepten in der S3-Leitlinie sowie den von der AGO formulierten Therapieempfehlungen. Um das aktuelle Therapieverhalten in Deutschland für über 70-jährige Patientinnen mit Mammakarzinom zu erfassen, wurde eine Umfrage bei Prüfzentren der German Breast Group (GBG) durchgeführt.

**Methode:** Es wurde eine Online-Umfrage unter 599 studienverantwortlichen Ärzten durchgeführt, die in der Datenbank der GBG als Prüfarzt/ärztin registriert sind. Mit dem 12-Item-Fragebogen wurden die systemischen Therapieeinsätze bei einer 70-jährigen Patientin in verschiedenen Settings untersucht. Die Indikation für eine Chemotherapie wurde als gegeben definiert.

**Ergebnis:** 62% der Ärzte in der Neoadjuvanz und 56,6% in der Adjuvanz entschieden sich für eine anthrazyklin- und taxanhaltige Therapie. In der primär metastasierenden Situation sowohl in der First-Line-Therapie nach einer anthrazyklinhaltigen Therapie wurde von einem Drittel der Befragten eine taxanhaltige Therapie mit Antiangiogenese-Hemmer Bevacizumab präferiert. Bestand der Status nach anthrazyklin- und taxanhaltiger Therapie in der Neo-/Adjuvanz, so wurden solche Substanzen als Capecitabin (ca. 30%) und Navelbine (ca. 20%) eingesetzt.

**Fazit:** Das Regime einer Chemotherapie bei einer 70-jährigen und älteren Patientin in Deutschland zeigt eine relativ einheitliche Ausrichtung und entspricht den Empfehlungen der S3-Leitlinien und AGO Mamma.

### Abstract

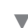

**Aim:** Around half of all women in Germany with breast cancer are older than 65 and approximately one third of them is older than 70 years of age. In theory, the preferred therapeutic management of women with breast cancer aged 65 and above corresponds to that formulated for younger patients and complies with the S3 Guidelines and the therapy recommendations formulated by AGO. To study the current therapies used to treat women with breast cancer aged 70 and above in Germany, a survey of the clinics of the German Breast Group (GBG) was done.

**Method:** An online survey was carried out with requests sent to 599 physicians registered as principal investigators in the database of the GBG. The 12-item questionnaire was used to investigate the systematic therapeutic management of 70-year-old patients in different settings. The indication for chemotherapy was taken as a given.

**Results:** In a neoadjuvant setting, 62% of physicians opted for anthracycline and taxane-based therapy as did 56.6% of physicians in an adjuvant setting. One third of physicians preferred a taxane-based therapy with the anti-angiogenesis inhibitor bevacizumab as first-line therapy for primary metastatic cancer and after anthracycline-based therapy. Capecitabine (around 30%) and navelbine (around 20%) were proposed as second-line neoadjuvant and adjuvant therapies after prior anthracycline- and taxane-based therapy.

**Conclusion:** The chemotherapy regimen prescribed for women with breast cancer aged 70 and above in Germany appears to be relatively standardised and corresponds to the recommendations given in the S3 Guidelines and by the AGO Breast Committee.

**eingereicht** 30. 10. 2012

**revidiert** 16. 4. 2013

**akzeptiert** 16. 4. 2013

### Bibliografie

**DOI** <http://dx.doi.org/10.1055/s-0032-1328612>  
Geburtsh Frauenheilk 2013; 73:  
1–7 © Georg Thieme Verlag KG  
Stuttgart · New York ·  
ISSN 0016-5751

### Korrespondenzadresse

**Dr. med. Jana Barinoff**  
Kliniken Essen Mitte  
Gynäkologie und  
Gynäkologische Onkologie  
Henricistraße 92  
45136 Essen  
barinoff.jana@googlemail.com

## Einleitung

Ca. 72 000 neue invasive und nicht invasive Mammakarzinome werden jährlich in Deutschland diagnostiziert. Die Gruppe der 65- bis 69-Jährigen hält mit 409,6 neuen Diagnosen (sog. altersspezifische Erkrankungsrate) pro 100 000 im Jahr 2007–2008 den 1. Platz. Mit 333,8 neuen Diagnosen pro 100 000 folgt das Alter zwischen 70–74 Jahren auf dem 2. Platz, dicht gefolgt von der Altersgruppe der 75–79-Jährigen mit 325,3 neuen Erkrankungen pro 100 000. Die 80–85-jährigen Frauen wiesen die altersspezifischen Erkrankungsraten von 348,6/100 000 und die 85-Jährigen und älteren eine Rate von 361,5/100 000 neuen Diagnosen im Jahr auf [1]. Somit ist knapp die Hälfte der Patientinnen über 65 Jahre alt und ca. ein Drittel älter als 70 Jahre [2,3].

Die Zahl der Frauen über 65 Jahren wird sich vermutlich in den nächsten 20 Jahren verdoppeln (NCCN), da die Generation der Babyboomer (in Deutschland werden die im Zeitraum von 1955 bis 1965 Geborenen von Statistikern als geburtenstarke Jahrgänge bezeichnet) in das höhere Lebensalter kommt. Dieses ist umso bedeutsamer, als Frauen über 70 Jahre in den bislang durchgeführten adjuvanten klinischen Studien unterrepräsentiert sind, sodass Therapieentscheidungen häufig ohne eine verlässliche Datengrundlage getroffen werden müssen [4–7]. Wichtig ist zu beachten, dass es Faktoren gibt, die über das rein chronologische Alter hinaus bedeutsam sind. Dazu gehören die physiologische bzw. die funktionelle Reserve, Begleiterkrankungen, das Ausmaß der kognitiven Funktionen, die Verfügbarkeit sozialer Unterstützung und die individuelle Lebenserwartung [5,7]. Es bestehen z. B. bei den 65- bis 74-Jährigen in 17% 6 zusätzliche Begleiterkrankungen. Bei den über 75-Jährigen ist dieses schon bei 27% der Fall.

Die therapeutischen Präferenzen für die über 65-jährigen Brustkrebspatientinnen entsprechen den Konzepten für jüngere Patientinnen und sind konform mit den Konzepten in der S3-Leitlinie [8] sowie der von der AGO formulierten Therapieempfehlungen [9]. Allerdings erhält nur ein Teil der älteren Patientinnen in Deutschland eine leitlinienkonforme Therapie, wie die kürzlich publizierte Arbeit von Hancke et al. ergab [10]. Eine weitere aktuelle Übersichtsarbeit von Sautter-Bihl et al. untersuchte die Literatur zum Thema „elderly patient and breast cancer“ und kam zur Aussage, dass „Patientinnen mit einer Lebenserwartung von mehr als 5 Jahren und nicht zu ausgeprägter Komorbidität adjuvante Chemotherapie, Trastuzumab und Bestrahlung entsprechend dem Standard erhalten sollten, wohingegen gebrechliche ältere Patientinnen eine reduzierte oder keine adjuvante Standardtherapie erhalten sollten“ [11].

Um das aktuelle Therapieverhalten in Deutschland für über 70-jährige Patientinnen mit Mammakarzinom zu erfassen, wurde eine Umfrage bei Prüfzentren der German Breast Group (GBG) durchgeführt.

## Methode

Es wurde eine Online-Umfrage unter 599 studienverantwortlichen Ärzten durchgeführt, die in der Datenbank der GBG als Prüfärzt/-ärztin registriert sind. Die Ärzte wurden einmalig per E-Mail kontaktiert, es wurde kein Recall-System etabliert. Bei der Entwicklung des fallbezogenen 12-Item-Fragebogens stand die klinische Relevanz der einzelnen Fragen im Vordergrund (► Tab. 1). Es handelte sich um 11 Multiple-Choice- und eine offen zu beantwortende Frage mit nur einer Antwortmög-

Tab. 1 Fragebogen und Teilnehmercharakteristika.

| Fragen                                                                                                                               | Häufigkeit | Prozent |
|--------------------------------------------------------------------------------------------------------------------------------------|------------|---------|
| <b>Arbeiten Sie in:</b>                                                                                                              |            |         |
| Krankenhaus mit onkologischem Schwerpunkt                                                                                            | 66         | 42,0    |
| Krankenhaus der Regelversorgung                                                                                                      | 22         | 14,0    |
| Praxis                                                                                                                               | 40         | 25,5    |
| Universitätsklinik                                                                                                                   | 21         | 13,4    |
| unbekannt                                                                                                                            | 8          | 5,1     |
| <b>Welche Funktion bekleiden Sie?</b>                                                                                                |            |         |
| Assistenzarzt                                                                                                                        | 3          | 1,9     |
| Chefarzt/Leiter                                                                                                                      | 63         | 40,1    |
| Facharzt                                                                                                                             | 26         | 16,6    |
| Oberarzt                                                                                                                             | 52         | 33,1    |
| unbekannt                                                                                                                            | 13         | 8,3     |
| <b>Sie haben eine Ausbildung oder bilden sich aus als:</b>                                                                           |            |         |
| Gynäkologe                                                                                                                           | 120        | 76,4    |
| internistischer Onkologe                                                                                                             | 24         | 15,3    |
| unbekannt                                                                                                                            | 13         | 8,3     |
| <b>Wie viele primäre Mammakarzinome (Ersterkrankungen) haben Sie im letzten Jahr in Ihrer Praxis/Klinik behandelt?</b>               |            |         |
| 0–30                                                                                                                                 | 1          | 0,6     |
| 30–60                                                                                                                                | 15         | 9,6     |
| 60–100                                                                                                                               | 21         | 13,4    |
| 100–200                                                                                                                              | 59         | 37,6    |
| 200–300                                                                                                                              | 30         | 19,1    |
| 300–400                                                                                                                              | 13         | 8,3     |
| > 500                                                                                                                                | 9          | 5,7     |
| <b>Wie viele metastasierte Mammakarzinome (neue Patientinnen) wurden im letzten Jahr in Ihrer Praxis/Klinik erstmalig behandelt?</b> |            |         |
| 0–10                                                                                                                                 | 5          | 3,2     |
| 10–20                                                                                                                                | 45         | 28,7    |
| 30–40                                                                                                                                | 46         | 29,3    |
| 40–50                                                                                                                                | 19         | 12,1    |
| 50–100                                                                                                                               | 20         | 12,7    |
| 100–200                                                                                                                              | 10         | 6,4     |

lichkeit. Die Fragen bezogen sich auf das Therapieverhalten bei einer Patientin im Alter zwischen 70 und 80 Jahren mit ECOG-Performance-Status 1, einigen internistischen, aber stabilen und medikamentös gut eingestellten Vorerkrankungen, ohne dass diese eine Kontraindikationen gegen bestimmte Zytostatika darstellen. Die Indikation für eine Chemotherapie in verschiedenen Settings (neoadjuvant, adjuvant, palliativ) wurde als gestellt und nicht zur Diskussion stehend angegeben.

Die Frist zur Beantwortung betrug 4 Wochen, die Auswertung erfolgte anonymisiert. Es wurde keine Analyse zwischen den Teilnehmern vs. Nichtteilnehmern durchgeführt. Die deskriptive Auswertung erfolgte mittels IBM SPSS Statistik 20 [12] sowie Excel 2010 [13]; die Ergebnisse wurden durch die Verwendung von Balken- und Kreisdiagrammen aufbereitet.

## Ergebnisse

Von den 599 angeschriebenen Prüfärzten antworteten 159 Ärzte (26,5%); 137 (22,9%) beantworteten alle, weitere 22 (3,7%) beantworteten nur einen Teil der Fragen. Die Teilnehmercharakteristika sind in ► Tab. 1 präsentiert.

Auf die Frage, wie viele Mammakarzinome als Ersterkrankung in der jeweiligen Einrichtung jährlich behandelt werden, waren die Institutionen mit zwischen 100 bis 200 primären Mammakarzinomen mit 37,6% am häufigsten vertreten. 19,1% der befragten

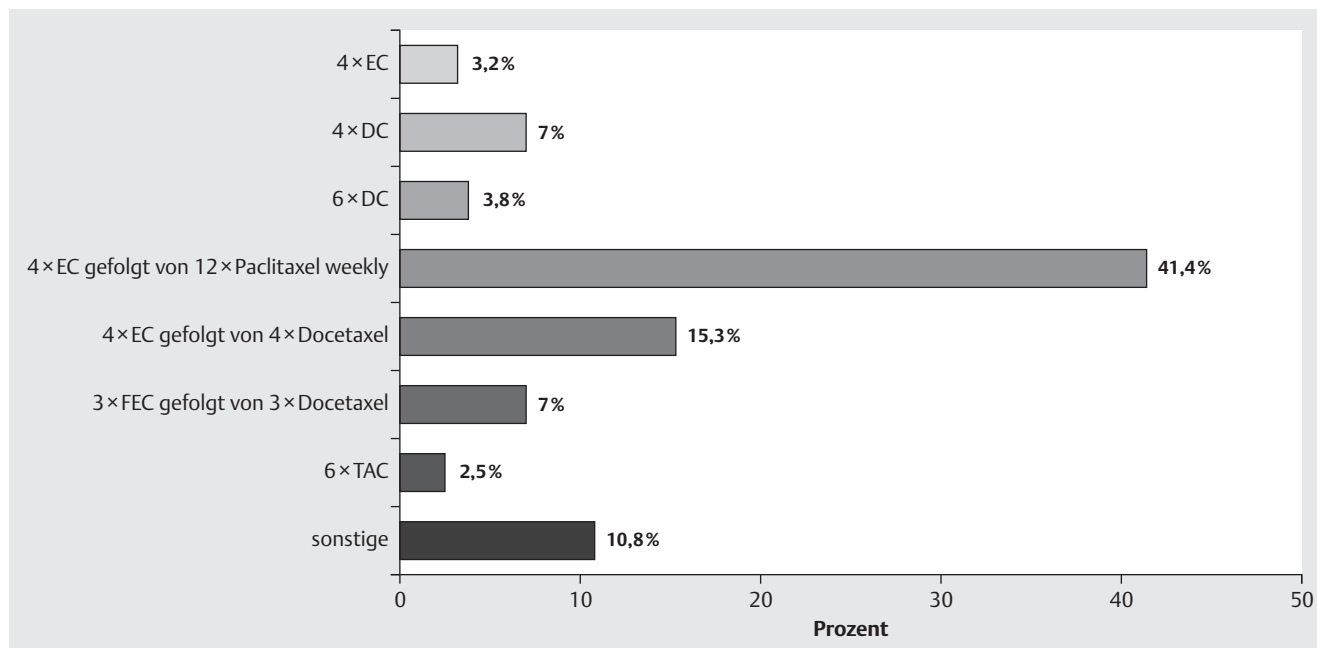

**Abb. 1** Frage: „Welches neoadjuvante Regime setzen Sie in einer solchen Situation am ehesten ein?“ EC – Epirubicin, Cyclophosphamid; DC – Doceta-

xel, Cyclophosphamid; FEC – Fluorouracil, Epirubicin, Cyclophosphamid; TAC – Docetaxel, Adriamycin, Cyclophosphamid

Einrichtungen therapieren 200–300 Fälle jährlich, gefolgt von 13,4% mit 60–100 Mammakarzinomen pro Jahr. In 8,3% waren es Brustzentren mit 300–400 primären Fällen und in 5,7% Einrichtungen mit über 500 primären Fällen innerhalb von 12 Monaten. Hinsichtlich neuer Patientinnen mit metastasierenden Mammakarzinomen gab jeweils ein Drittel der Teilnehmer an, 30–40 bzw. 10–20 Patientinnen pro Jahr zu sehen (29,3 bzw. 28,7%). 12,7% der Befragten diagnostizierten jährlich bei 50–100 Patientinnen und 6,4% der Teilnehmer bei 100–200 Patientinnen einen metastasierten Status nach Mammakarzinom in der Anamnese (● **Tab. 1**).

Für den Fall, dass eine neoadjuvante Chemotherapie durchgeführt werden sollte (vorausgesetzt wurde eine Indikation für die Chemotherapie aufgrund der Tumormetrik, des Lymphknotenstatus, des negativen HR-Status oder des positiven Her2neu-Status), legten sich knapp 40% aller Befragten auf eine sequenzielle anthrazyklin-/taxanhaltige Therapie (4 × EC gefolgt von 12 × Paclitaxel weekly) fest. Dabei würden in einem solchen Fall 15% der Ärzte ihrer Patientin 4 × EC gefolgt von 4 × Docetaxel verabreichen und 7% würden 3 × FEC gefolgt von 3 × Docetaxel applizieren. Weitere 7% würden 4 × Docetaxel/Cyclophosphamid (DC) empfehlen. Knapp 11% der Therapeuten entschieden sich für die Kategorie „sonstige“ (● **Abb. 1**).

Für den Fall, dass bei der gleichen Patientin eine adjuvante Chemotherapie durchgeführt werden sollte, wurde die Kombination 4 × EC gefolgt von 12 × Paclitaxel weekly weiterhin mit 39,5% vorrangig gewählt. Allerdings entschieden sich nur 2,5% der Ärzte für 4 × EC gefolgt von 4 × Docetaxel; 14,6% der Therapeuten empfehlen 3 × FEC gefolgt von 3 × Docetaxel. 9,6% würden 4 × DC einsetzen, aber nur 3,2% entschieden sich für 4 × EC (● **Abb. 2**).

Bei der nächsten Frage wurde die klinische Situation dahingehend verändert, dass eine primäre Metastasierung nachgewiesen wurde. Auch in diesem Fall war die Indikation für eine Chemotherapie als definitiv angegeben. Eine primäre taxanhaltige Monotherapie empfahlen 36,3% der Ärzte und knapp 30% würden eine der angegebenen Monotherapien in Kombi-

nation mit Bevacizumab einsetzen (zur Auswahl standen folgende Chemotherapeutika: Taxane, Anthrazykline, Capecitabine, Vinorelbine) (● **Abb. 3**).

In dem Fall, dass für dieselbe Patientin die Metastasierung erst nach einem 2,5-jährigen krankheitsfreien Intervall aufgetreten wäre und eine Chemotherapie für notwendig erachtet würde, entschieden sich 42,7% der Befragten für eine taxanhaltige Monotherapie, sollte die Patientin in der Neo-/Adjuvanz nur mit Anthrazyklinen therapiert worden sein (● **Abb. 4**). Im Gegensatz dazu waren 2,5% der Ärzte für ein taxanhaltiges Konzept, wenn eine anthrazyklin- und taxanhaltige Therapie in der nicht metastasierenden Situation gegeben wurde – Capecitabin- und Vinorelbine-Therapie waren dabei die Konzepte zur First-Line-Therapie (29,3 bzw. 19,1%). In beiden Gruppen lag der Anteil der Kombination mit Bevacizumab zwischen 30,6 und 25,5% (● **Abb. 5**). Abschließend wurden die Teilnehmer zu ihrem Interesse an der Teilnahme an klinischen Studien bei älteren Patientinnen befragt. Das Interesse an einer neoadjuvanten, adjuvanten oder palliativen Studie bestand bei 54,1, 81,5, bez. 58,6% (● **Tab. 2**). 31 Kollegen äußerten sich auch mit einer Studiendesignidee: In

**Tab. 2** Offene Frage über die Studienlandschaft.

|                                                                                                                    | Häufigkeit | Prozent |
|--------------------------------------------------------------------------------------------------------------------|------------|---------|
| <b>Hätten Sie Interesse an einer Studie zur Chemotherapie für ältere Patientinnen im neoadjuvanten Bereich?</b>    |            |         |
| nicht angekreuzt                                                                                                   | 72         | 45,9    |
| ja, das Interesse besteht                                                                                          | 85         | 54,1    |
| <b>Hätten Sie Interesse an einer Studie zur Chemotherapie für ältere Patientinnen im adjuvanten Bereich?</b>       |            |         |
| nicht angekreuzt                                                                                                   | 29         | 18,5    |
| ja, das Interesse besteht                                                                                          | 128        | 81,5    |
| <b>Hätten Sie Interesse an einer Studie zur Chemotherapie für ältere Patientinnen im metastasierenden Bereich?</b> |            |         |
| nicht angekreuzt                                                                                                   | 65         | 41,4    |
| ja, das Interesse besteht                                                                                          | 92         | 58,6    |

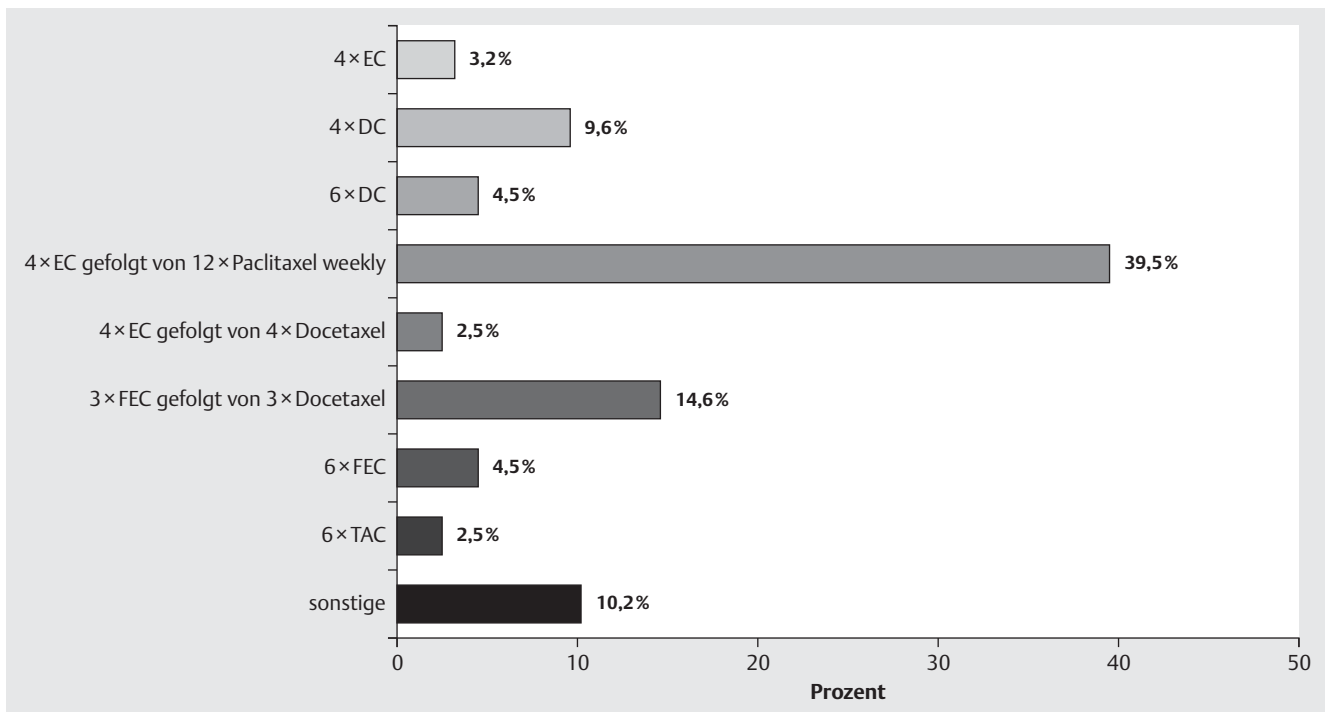

**Abb. 2** Frage: „Stellen Sie sich die gleiche Patientin vor, nur möchten Sie nun eine adjuvante Chemotherapie durchführen. Welches Regime setzen Sie in einer solchen Situation am ehesten ein?“

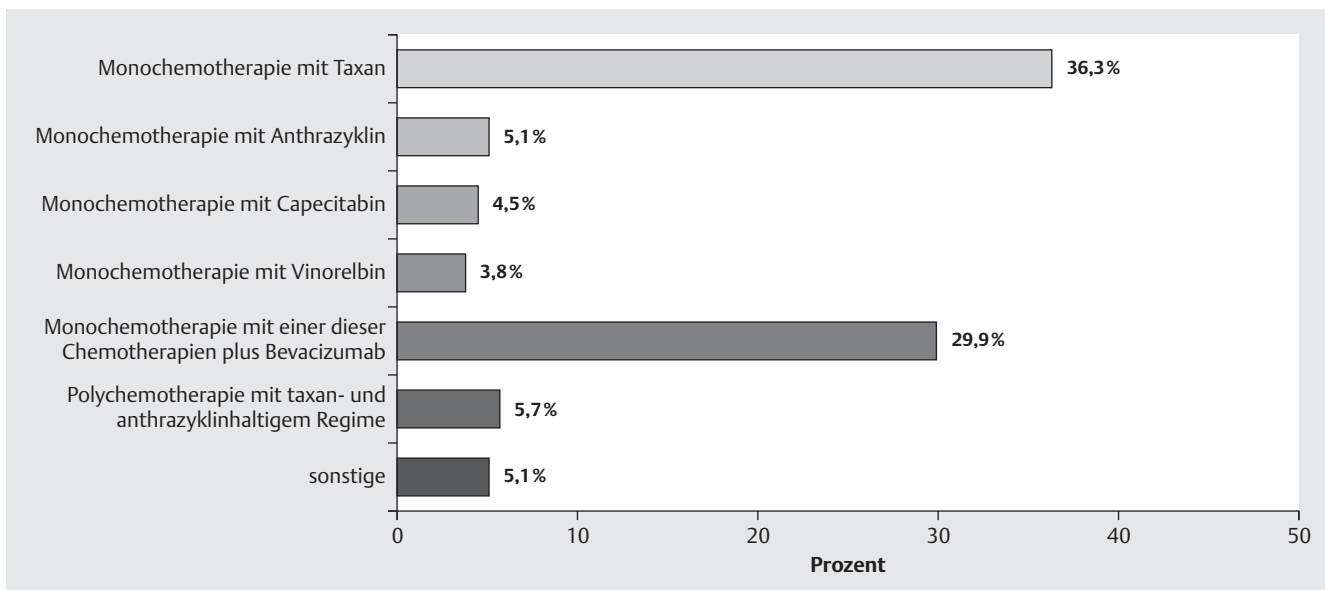

**Abb. 3** Frage: „Stellen Sie sich die gleiche Patientin vor, nur wurden bei der Staging-Untersuchung viszerale Metastasierung (z. B. Lebermetastasen)

diagnostiziert, sogenannte primär metastasierende Situation. Welches Regime werden Sie als First-Line-Option einsetzen?“

30% wurde ein Monoregime mit nab-Paclitaxel, liposomalem Doxorubicin, Eribulin, Capecitabine oder Vinorelbin vorgeschlagen und zwar in jedem Setting; für die Her2neu-positiven Patientinnen wurde ein chemotherapiefreies Konzept mit Trastuzumab und endokriner Therapie präferiert. Als zweithäufigste Variante wurden die Duplets mit 4–6 × Docetaxel/Cyclophosphamid vs. 4 × EC gefolgt von 12 × Paclitaxel vorgeschlagen. Die Idee, eine Monochemotherapie mit Polychemotherapie im neo-/adju-

vanten Setting zu vergleichen, wurde in ca. 25% diskutiert; auch die Kombination mit dem Angiogenese-Blocker Bevacizumab wurde in ca. 10% erwähnt. Insgesamt waren die vorgeschlagenen Konzepte auf die Akzeptanz und Berücksichtigung der Komorbidität und der Lebensqualität bedacht.

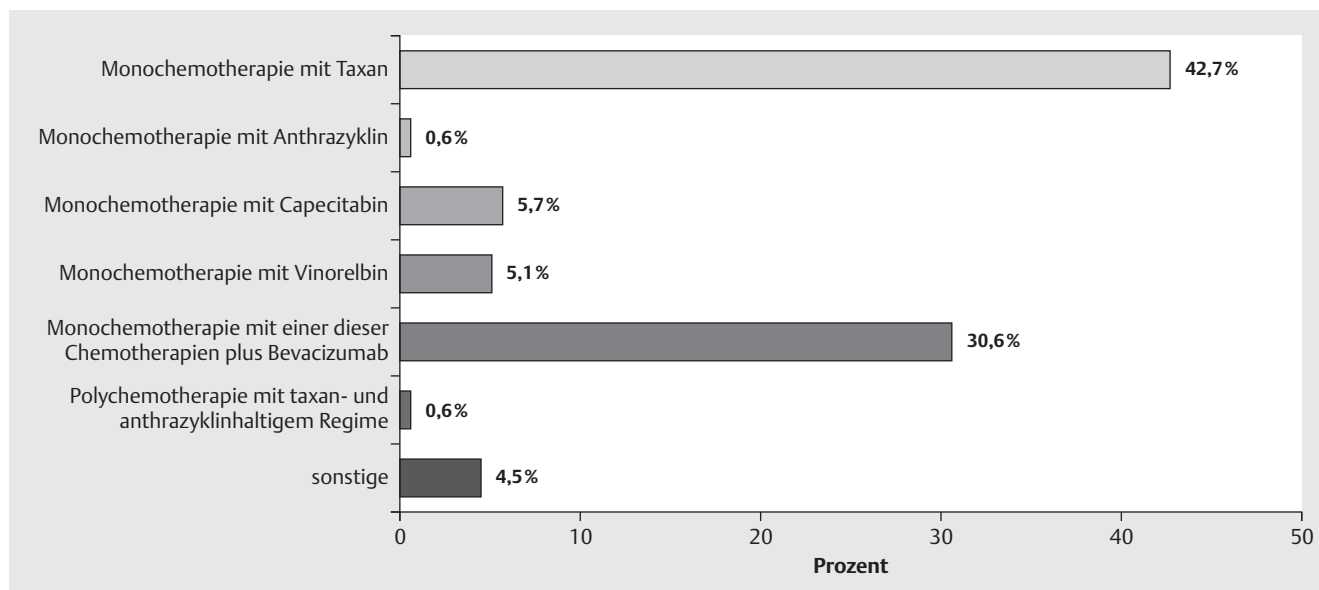

**Abb. 4** Frage: „Angenommen, die Patientin erleidet die Lebermetastasierung erst nach einem 2,5-jährigen krankheitsfreien Intervall, nachdem die

Patientin eine (neo-)adjuvante, anthrazyklinhaltige Therapie erhalten hatte. Welches Regime werden Sie als First-Line-Option einsetzen?“

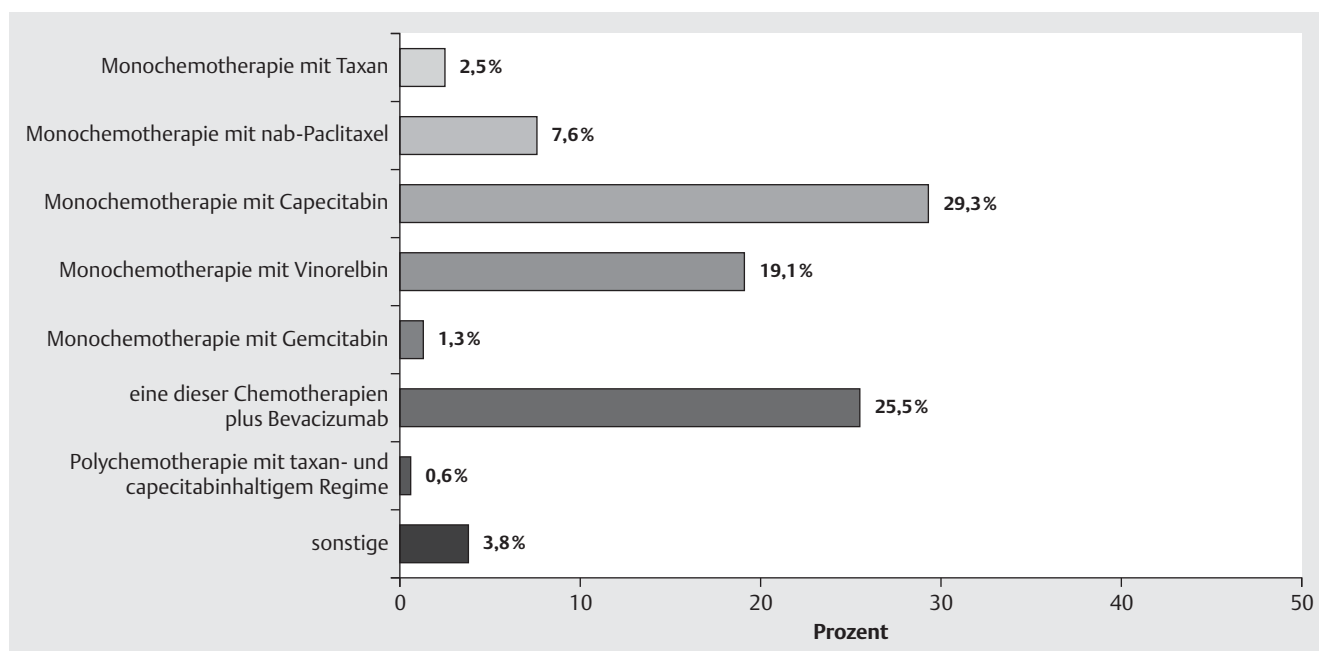

**Abb. 5** Frage: „Angenommen, dieselbe Patientin wäre mit einem Anthrazyklin und Taxan (neo-)adjuvant vorbehandelt, welches Regime werden Sie als First-Line-Option einsetzen?“

## Diskussion

Das Ziel dieser Untersuchung war, eine repräsentative Übersicht über die chemotherapeutischen Behandlungskonzepte, die in Deutschland im Jahr 2012 bei einer 70–80-jährigen Patientin mit ECOG 1 angewendet werden, zu bekommen. Die Teilnehmer der Befragung waren Prüfarzte bei Studien der GBG, insofern nach einem anzunehmenden höheren klinisch-wissenschaftlichen Interesse an der Behandlung dieser Patientinnen vorselektioniert. Mit rund 25% antwortenden Ärzten war die Rücklaufquote befriedigend, jedoch niedriger als bei Umfragen in anderen

Ländern [14, 15]. Über 40% der Befragten waren in den Kliniken mit onkologischem Schwerpunkt tätig, die Unikliniken nahmen mit 13% an der Umfrage teil. Bemerkenswert ist die Tatsache, dass ein Viertel der Teilnehmer niedergelassen ist und somit die zweitstärkste Gruppe in dem befragten Kollektiv darstellt. Mit 40% waren Chefarzte unter den antwortenden Prüfarzten die größte Gruppe; diese Tatsache zeigt, dass die Studienbetreuung oft in der Hand der Klinikleitung liegt und unterstreicht damit die Wichtigkeit dieses Feldes. Ob die Verteilung zwischen den Fachgruppen – zwei Drittel der befragten Kollegen sind Gynäkologen und 15% stellten sich als internistische Onkologen vor – der

Realität außerhalb der GBG-Studienlandschaft entspricht, ist fraglich.

Die meisten Brustzentren in der vorliegenden Befragung haben eine Größe zwischen 100 und 200 primären Fällen im Jahr. Die Einrichtungen, die zwischen 300 und 500 Mammakarzinomen in 12 Monaten behandeln, waren mit 14% im Gesamtkollektiv vertreten. Hinsichtlich der metastasierenden Fälle, so sehen ca. 60% aller Teilnehmer zwischen 10 und 40 neue Patientinnen im Jahr. Knapp 6% der Befragten gaben an, 100–200 neue metastasierende Patientinnen pro 12 Monaten zu behandeln. Man könnte diese Information bei der bestehenden Diskussion über die schwache Rekrutierung in die palliativen Studien berücksichtigen und die geeigneten Studienzentren gezielt aussuchen.

Bezüglich der Auswahl der Chemotherapien bei Frauen ohne Metastasen zeigte sich folgendes Ergebnis: die anthrazyklin-/taxanhaltige Therapie hat bei einer 70–80-jährigen Patientin einen festen Platz sowohl im neoadjuvanten als auch im adjuvanten Setting – und das, obwohl aktuelle Leitlinien auf Daten basieren, die an Patientinnen unter 65 Jahren erhoben wurden.

Die Auswahl der Therapien im palliativen Setting zeigte eine klare Orientierung der Teilnehmer: die taxanhaltige Monotherapie wird sowie bei Patientinnen mit primär metastasiertem Mammakarzinom als auch bei Frauen mit sekundär metastasiertem Karzinom präferiert. Die in einem Drittel der Antworten angegebene Kombination eines Chemotherapeutikums mit Bevacizumab zeigt, dass diese Substanz einen Einzug in das therapeutische Repetitorium der älteren Patientinnen gefunden hat. Wenn die Patientin mit Anthrazyklinen und Taxanen vorbehandelt worden war, so übernahmen die Monotherapien mit Capecitabin oder Vinorelbin die führende Rolle in den Empfehlungen. Es zeigte sich deutlich, dass eine Kombinationstherapie als First-Line-Option keinen Stellenwert in der Therapie einer metastasierenden Patientin jenseits des 70. Lebensjahrs hat.

Zur Frage eines möglichen Studiendesign äußerten sich die Befragten, dass sie eher zu einer Monotherapie mit einem günstigeren Nebenwirkungsprofil in neo-/adjuvanten Settings tendieren, auch wenn heute ein sequenzielles Regime aus 3 Substanzen präferiert wird.

Das Thema der „Untertherapie“ der älteren Patientin war und bleibt kontrovers. 2013 erschien eine Publikation aus USA, in der sich Malik et al. keinen Unterschied in 5-Jahres rezidivfreiem (lokal wie systemisch) Überleben zwischen der „untertherapierten“ und „regelrecht therapierten“ Patientinnen sehen konnte [16]. Trotz aller limitierenden Faktoren dieser Arbeit (retrospektive, monozentrische Analyse, Zeitraum der Erfassung 1978–2012) fragen sich die Autoren, welche Rolle tatsächlich eine leitlinienkonforme Therapie für dieses Kollektiv spielt.

Eine Reihe von prospektiv randomisierten Studien konnten allerdings zeigen, dass auch die älteren Patientinnen von einer anthrazyklin- oder taxanhaltigen Chemotherapie in Bezug auf ihr Überleben profitieren [17–19]. In diesen Untersuchungen war jedoch eine ungünstige Konstellation der tumorbiologischen Charakteristika sowie Hormonrezeptornegativität oder ein positiver Lymphknotenstatus die Voraussetzung. Loibl et al. führten eine gepoolte Analyse von 4 neo-/adjuvanten Studien durch und konnten an dem untersuchten Kollektiv zeigen, dass das Alter durchaus auf die Durchführbarkeit der Therapie sowie auf das Nebenwirkungsprofil Einfluss nimmt [20]. Eine weitere wichtige Information aus dieser Arbeit ist, dass die Toxizität bei den sequenziellen Regimen geringer ausgeprägt war als bei den kombinierten. Die Empfehlungen zum Therapiemanagement bei älteren Patientinnen von International Society of Geriatric Oncology (SIOG)

und European Society of Breast Cancer Specialists (EUSOMA) betonen, dass die Indikation für Chemotherapie altersunabhängig gestellt werden soll; eine standardisierte geriatrische Untersuchung nimmt dabei einen festen Platz in dem therapeutischen Konzept ein [21]. In der schon zitierten Übersichtsarbeit von Sautter-Bihl et al. wird erwähnt, dass außerhalb von Leitlinien aufgrund der wenigen verfügbaren Toxizitätsdaten bei der älteren Patientin im adjuvanten Regime eine Anthrazyklin-Monotherapie, alternativ jeweils 4 Zyklen Docetaxel/Doxorubicin oder Doxorubicin/Cyclophosphamid in Betracht kommen [11] – diese Regime fanden sich nicht als empfohlene Therapie in der aktuell vorgestellten GBG-Umfrage. Nichtsdestotrotz ist es unbestritten, dass gerade in diesem Kollektiv aufgrund der natürlichen Komorbidität therapeutische Flexibilität verbunden mit strenger Indikationsstellung einen besonderen Stellenwert hat. Den wenigen verfügbaren Toxizitätsdaten und chemotherapeutischen Konzepten für diese Patientengruppe kann man nur durch das Konzipieren und Realisieren der klinischen Studien – an dieser Stelle sei als Beispiel die ICE-II-Studie der GBG zu nennen – entgegenwirken [22]. Die aktuelle Therapieempfehlung der AGO Mamma weist darauf hin, dass solche Patientinnen vorzugsweise Chemotherapie im Rahmen einer Studie bekommen sollten (LOE: 2a/c, AGO-Empfehlungsgrad +) [9].

Zusammenfassend lässt sich sagen, dass das Regime einer Chemotherapie bei einer 70-jährigen und älteren Patientin in Deutschland eine relativ einheitliche Ausrichtung hat und den Empfehlungen der S3-Leitlinien [23] und AGO Mamma [9] sowie SIOG und EUSOMA [21] entspricht.

## Interessenkonflikt

▼  
Nein.

## Institute

- <sup>1</sup> Gynäkologie und Gynäkologische Onkologie, Kliniken Essen Mitte, Essen
- <sup>2</sup> Frauenklinik für Gynäkologie und Geburtshilfe, Universitätsklinikum Aachen, Aachen
- <sup>3</sup> Universitätsfrauenklinik, Universitätsklinikum Magdeburg A. ö. R, Magdeburg
- <sup>4</sup> Klinik für Gynäkologie und Gynäkologische Onkologie, Dr-Horst-Schmidt-Kliniken, Wiesbaden
- <sup>5</sup> Klinik für Gynäkologie und Geburtshilfe, Diakoniekrankenhaus Henriettenstiftung, Hannover
- <sup>6</sup> Gynäkologisch-Onkologische Schwerpunktpraxis, Hannover
- <sup>7</sup> Frauenklinik, Universitätsklinikum Schleswig-Holstein, Kiel
- <sup>8</sup> Klinik und Poliklinik für Geburtshilfe und Frauenkrankheiten, Universitätsmedizin Mainz, Mainz
- <sup>9</sup> Neue Frauenklinik, Luzerner Kantonsspital, Luzern, Schweiz
- <sup>10</sup> Klinik für Gynäkologie und Geburtshilfe, Agaplesion Markus Krankenhaus, Frankfurt am Main
- <sup>11</sup> German Breast Group, Neu Isenburg

## Literatur

- 1 Robert Koch-Institut; Gesellschaft für epidemiologische Krebsregister in Deutschland e.V., eds. Krebs in Deutschland 2007/2008. Häufigkeit und Trends. 8th revised ed. Berlin: Robert Koch-Institut; 2012; www.rki.de/krebs; Stand: 5.10.2012
- 2 Jahrbuch Statistisches Bundesamt für die Bundesrepublik Deutschland 2008. <http://www.destatis.de>; Stand: 5.10.2012
- 3 Robert Koch-Institut; Gesellschaft für epidemiologische Krebsregister in Deutschland e.V., eds. Krebs in Deutschland 2005/2006. Häufigkeiten und Trends. 7th revised ed. Berlin: Robert Koch-Institut; 2010; www.rki.de/krebs; Stand: 5.10.2012
- 4 Gennari R, Audisio RA. Breast cancer in elderly women. Optimizing the treatment. Breast Cancer Res Treat 2008; 110: 199–209
- 5 Bernardi D, Errante D, Galligioni E et al. Treatment of breast cancer in older women. Oncologica 2008; 47: 187–198

- 6 Reed MWR, Wyld L, Ellis P *et al.*; on behalf of the ACTION and ESTEEM Trial Management Groups. Breast cancer in older women: trials and tribulations. *Clin Oncol* 2009; 21: 99–102
- 7 Wildiers H, Kunkler I, Biganzoli L *et al.* Management of breast cancer in elderly individuals: recommendations of the International Society of Geriatric Oncology. *Lancet* 2007; 8: 1101–1115
- 8 [www.dggg.de/startseite/nachrichten/s3-leitlinie-mammakarzinom/](http://www.dggg.de/startseite/nachrichten/s3-leitlinie-mammakarzinom/); Stand: 12.10.2012
- 9 [www.ago-online.de/de/fuer-mediziner/leitlinien/mamma/](http://www.ago-online.de/de/fuer-mediziner/leitlinien/mamma/); Stand: 12.10.2012
- 10 Hancke K, Denking MD, König J *et al.* Standard treatment of female patients with breast cancer decreases substantially for women aged 70 years and older: a German clinical cohort study. *Ann Oncol* 2010; 21: 748–753
- 11 Sautter-Biehl ML, Souchon R, Gerber B. Adjuvante Therapie des Mammakarzinoms bei Patientinnen über 65 Jahre. *DÄ* 2011; 108: 365–371
- 12 [www-01.ibm.com/software/de/stats20/](http://www-01.ibm.com/software/de/stats20/); Stand: 5.10.2012
- 13 [microsoft-excel-2010.softonic.de/](http://microsoft-excel-2010.softonic.de/); Stand: 5.10.2012
- 14 Grava-Gubins I, Scott S. Effects of various methodologic strategies: survey response rates among Canadian physicians and physicians-in-training. *Can Fam Physician* 2008; 54: 1424–1430
- 15 Thorpe C, Ryan B, McLean SL *et al.* How to obtain excellent response rates when surveying physicians. *Fam Pract* 2009; 26: 65–68
- 16 Malik MK, Tartter PI, Belfer I. Untreated breast cancer in the elderly. *JCE* 2013; Article ID 893104; Epub 2013 Jan 10
- 17 Crivellari D, Bonetti M, Castiglione-Gertsch M *et al.* Burdens and benefits of adjuvant cyclophosphamide, methotrexate, and fluorouracil and tamoxifen for elderly patients with breast cancer: The International Breast Cancer Study Group Trial VII. *J Clin Oncol* 2000; 18: 1412–1422
- 18 Reimer T, Nitz U, Potenberg J. Capecitabine as adjuvant treatment in elderly patients with early breast cancer – an interim safety analysis of the ICE studies. *Breast Cancer Res Treat* 2006; 100 (Suppl. 1): S112
- 19 Jones S, Holmes FA, O'Shaughnessy J. Docetaxel with cyclophosphamide is associated with an overall survival benefit compared with doxorubicin and cyclophosphamide: 7-year follow-up of US oncology research trial 9735. *J Clin Oncol* 2009; 27: 1177–1183
- 20 Loibl S, von Minckwitz G, Harbeck N *et al.* Clinical feasibility of (neo)adjuvant taxane-based chemotherapy in older patients: analysis of >4,500 patients from four German randomized breast cancer trials. *Breast Cancer Res* 2008; 10: R77
- 21 Biganzoli L, Wildiers H, Oakman C *et al.* Management of elderly patients with breast cancer: updated recommendations of the International Society of Geriatric Oncology (SIOG) and European Society of Breast Cancer Specialists (EUSOMA). *Lancet Oncol* 2012; 13: e148–e160
- 22 [www.germanbreastgroup.de/studien.html](http://www.germanbreastgroup.de/studien.html); Stand: 10.12.2012
- 23 Interdisziplinäre S3-Leitlinie für die Diagnostik, Therapie und Nachsorge des Mammakarzinoms. Version 3.0, Aktualisierung 2012. [www.senologie.org/publikationen/leitlinien/](http://www.senologie.org/publikationen/leitlinien/); Stand: 10.12.2012
